# Supplementary material for: Region-specific proteomic profiling of brain interstitial fluid via a micro-invasive sampling platform
Source: Royal Society of Chemistry journal article supplement (doi:10.1039/d6lc00038j), 2026-04-13
Supplement: d6lc00038j2.pdf [file d6lc00038j2.pdf]

### **List of Supplementary Materials**

Fig S1 Gauge pressure measurement setup.

Fig S2 Grouping of identified proteins by cellular localization.

Fig S3 Volcano plot showing common proteins that are differentially expressed between ISF from the nucleus accumbens (NA) and CSF.

Fig S4 Pathway enrichment analysis of proteins detected in the substantia nigra.

Table S1 List of proteins identified in control samples.

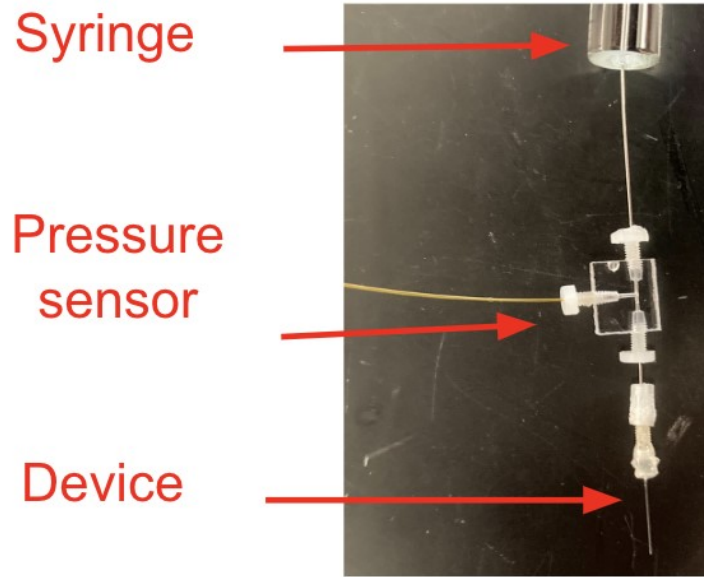

**Figure S1 Gauge pressure measurement setup.** The inlet pressure of the probe was monitored using a fiber optic pressure sensor (FISO Technologies, FOP-LS-PT9-10). A specially designed tri-inlet adapter facilitated the connection between the probe, sensor, and syringe needle. The probe tip was maintained at atmospheric pressure, enabling the measurement of pressure variations across the probe during fluid infusion or withdrawal by a syringe pump.

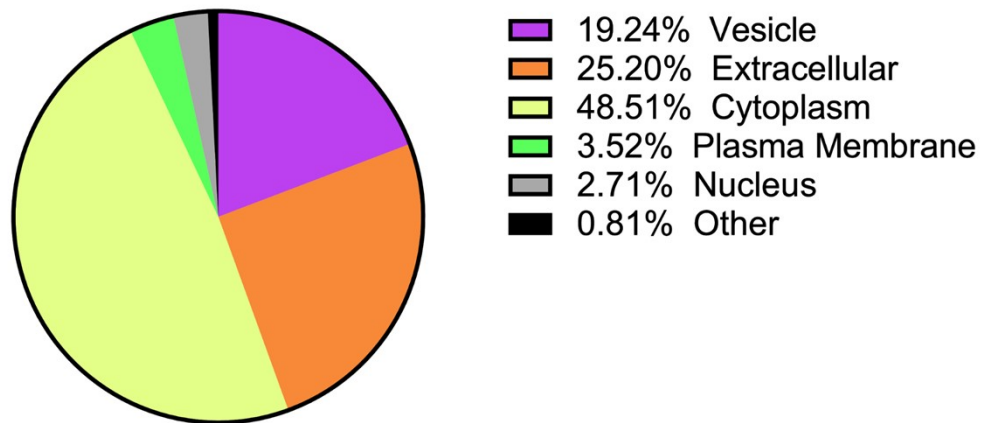

**Figure S2 Grouping of identified proteins by cellular localization.**  
Cellular localization data was obtained from the GO database.

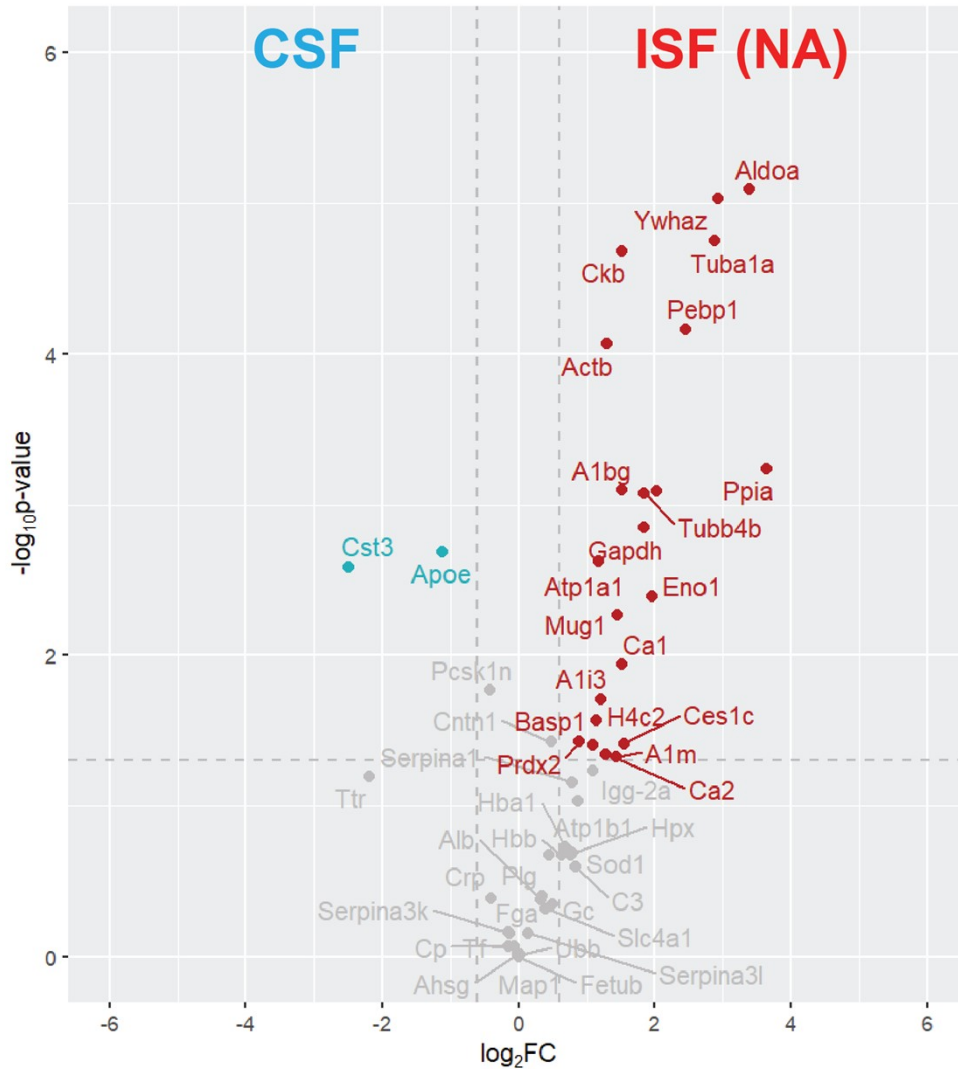

**Figure S3** Volcano plot showing common proteins that are differentially expressed between ISF from the nucleus accumbens (NA) and CSF. The horizontal dotted line represents a significance level of  $p = 0.05$  ( $-\log_{10} = 1.3$ ), and the vertical dotted lines represent a fold change of  $\pm 1.5$ . Only proteins found in both ISF (NA) and CSF were included in the plot. Proteins found in both groups but lacking statistical significance—such as those detected in only a single animal within a group—were excluded.

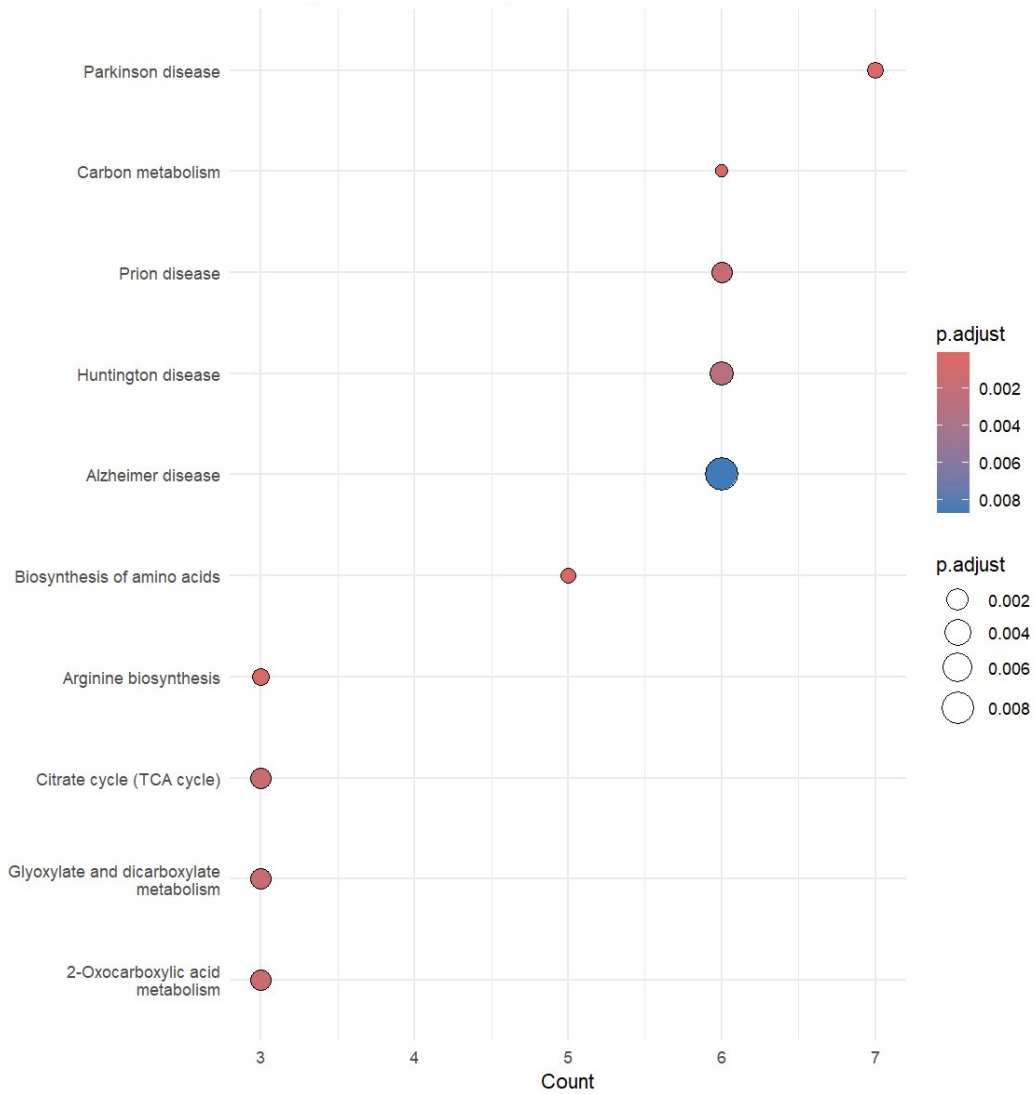

**Figure S4 Pathway enrichment analysis of proteins detected in the substantia nigra.** Pathway enrichment analysis was performed using the Bioconductor package clusterProfiler.

**Table S1 List of proteins identified in control samples.**

| Proteins Identified                                                                       | Accession Number | Alternate ID | Molecular Weight |
|-------------------------------------------------------------------------------------------|------------------|--------------|------------------|
| Cationic trypsin-3 OS=Rattus norvegicus OX=10116 GN=Try3 PE=2 SV=1                        | P08426           | Try3         | 26 kDa           |
| Desmoplakin OS=Rattus norvegicus OX=10116 GN=Dsp PE=1 SV=1                                | F1LMV6           | Dsp          | 332 kDa          |
| Histone H4 OS=Rattus norvegicus OX=10116 GN=H4c2 PE=1 SV=2                                | P62804           | H4c2         | 11 kDa           |
| Junction plakoglobin OS=Rattus norvegicus OX=10116 GN=Jup PE=1 SV=1                       | Q6P0K8           | Jup          | 82 kDa           |
| Keratin, type I cytoskeletal 10 OS=Rattus norvegicus OX=10116 GN=Krt10 PE=3 SV=1          | Q6IFW6           | Krt10        | 57 kDa           |
| Keratin, type I cytoskeletal 14 OS=Rattus norvegicus OX=10116 GN=Krt14 PE=2 SV=1          | Q6IFV1           | Krt14        | 53 kDa           |
| Keratin, type I cytoskeletal 17 OS=Rattus norvegicus OX=10116 GN=Krt17 PE=1 SV=1          | Q6IFU8           | Krt17        | 48 kDa           |
| Keratin, type I cytoskeletal 18 OS=Rattus norvegicus OX=10116 GN=Krt18 PE=1 SV=3          | Q5BJY9           | Krt18        | 48 kDa           |
| Keratin, type I cytoskeletal 19 OS=Rattus norvegicus OX=10116 GN=Krt19 PE=1 SV=2          | Q63279           | Krt19        | 45 kDa           |
| Keratin, type I cytoskeletal 42 OS=Rattus norvegicus OX=10116 GN=Krt42 PE=3 SV=1          | Q6IFU7           | Krt42        | 50 kDa           |
| Keratin, type II cytoskeletal 1 OS=Rattus norvegicus OX=10116 GN=Krt1 PE=2 SV=1           | Q6IMF3           | Krt1         | 65 kDa           |
| Keratin, type II cytoskeletal 2 epidermal OS=Rattus norvegicus OX=10116 GN=Krt2 PE=3 SV=1 | Q6IG02           | Krt2         | 69 kDa           |
| Keratin, type II cytoskeletal 5 OS=Rattus norvegicus OX=10116 GN=Krt5 PE=1 SV=1           | Q6P6Q2           | Krt5         | 62 kDa           |
| Keratin, type II cytoskeletal 6A OS=Rattus norvegicus OX=10116 GN=Krt6a PE=1 SV=1         | Q4FZU2           | Krt6a        | 59 kDa           |
| Keratin, type II cytoskeletal 72 OS=Rattus norvegicus OX=10116 GN=Krt72 PE=3 SV=2         | Q6IG04           | Krt72        | 57 kDa           |
| Keratin, type II cytoskeletal 73 OS=Rattus norvegicus OX=10116 GN=Krt73 PE=1 SV=1         | Q6IG03           | Krt73        | 60 kDa           |
| Keratin, type II cytoskeletal 75 OS=Rattus norvegicus OX=10116 GN=Krt75 PE=3 SV=2         | Q6IG05           | Krt75        | 59 kDa           |
| Keratin, type II cytoskeletal 8 OS=Rattus norvegicus OX=10116 GN=Krt8 PE=1 SV=3           | Q10758           | Krt8         | 54 kDa           |
| Keratin, type II cytoskeletal 80 OS=Rattus norvegicus OX=10116 GN=Krt80 PE=3 SV=1         | Q6IMF1           | Krt80        | 51 kDa           |
| Polyubiquitin-B OS=Rattus norvegicus OX=10116 GN=Ubb PE=1 SV=1                            | P0CG51           | Ubb          | 34 kDa           |
| Pyruvate carboxylase, mitochondrial OS=Rattus norvegicus OX=10116 GN=Pc PE=1 SV=2         | P52873           | Pc           | 130 kDa          |
| Serine protease 1 OS=Rattus norvegicus OX=10116 GN=Prss1 PE=1 SV=1                        | P00762           | Prss1        | 26 kDa           |
