# Supplementary material for: Region-specific proteomic profiling of brain interstitial fluid via a micro-invasive sampling platform
Source: Lab Chip. 2026 Apr 13;26(10):3153–67. doi: 10.1039/d6lc00038j (PMC13096881; doi:10.1039/d6lc00038j)
Supplement: LC-026-D6LC00038J-s001 [file LC-026-D6LC00038J-s001.xlsx]

## Sheet: Sheet1
Identified Proteins (598)	Accession Number	Alternate ID	Molecular Weight	Protein Grouping Ambiguity	NA1	NA2	NA3	NA4	NA5	NA6	NA7	NA8	SN1	SN2	SN3	SN4	SN5	SN6	V1	V2	V3	V4	V5
10 kDa heat shock protein, mitochondrial OS=Rattus norvegicus OX=10116 GN=Hspe1 PE=1 SV=3	P26772	Hspe1	11 kDa		7		3	6	9		4	7	1
14-3-3 protein beta/alpha OS=Rattus norvegicus OX=10116 GN=Ywhab PE=1 SV=3	P35213	Ywhab	28 kDa	TRUE	29	2	9	14	23	20	11	17
14-3-3 protein epsilon OS=Rattus norvegicus OX=10116 GN=Ywhae PE=1 SV=1	P62260	Ywhae	29 kDa	TRUE	26	3	10	20	27	20	10	14	3	5						4
14-3-3 protein eta OS=Rattus norvegicus OX=10116 GN=Ywhah PE=1 SV=2	P68511	Ywhah	28 kDa	TRUE	19	2	5	11	17	11	7	10
14-3-3 protein gamma OS=Rattus norvegicus OX=10116 GN=Ywhag PE=1 SV=2	P61983	Ywhag	28 kDa	TRUE	29	2	12	15	22	20	16	18		7						7
14-3-3 protein theta OS=Rattus norvegicus OX=10116 GN=Ywhaq PE=1 SV=1	P68255	Ywhaq	28 kDa	TRUE	22		6	11	19	13	8	10	5	9
14-3-3 protein zeta/delta OS=Rattus norvegicus OX=10116 GN=Ywhaz PE=1 SV=1	P63102	Ywhaz	28 kDa	TRUE	42	5	14	19	30	31	22	21	8	9		2			4	8			2
2',3'-cyclic-nucleotide 3'-phosphodiesterase OS=Rattus norvegicus OX=10116 GN=Cnp PE=1 SV=2	P13233	Cnp	47 kDa		27	3	5	14	45	2	5	19	10							15
4-aminobutyrate aminotransferase, mitochondrial OS=Rattus norvegicus OX=10116 GN=Abat PE=1 SV=3	P50554	Abat	56 kDa		9		3	7	17	9	4	8
4F2 cell-surface antigen heavy chain OS=Rattus norvegicus OX=10116 GN=Slc3a2 PE=1 SV=1	Q794F9	Slc3a2	58 kDa		2							1
60 kDa heat shock protein, mitochondrial OS=Rattus norvegicus OX=10116 GN=Hspd1 PE=1 SV=1	P63039	Hspd1	61 kDa		42	1		4	24		7	16
Acetyl-CoA acetyltransferase, mitochondrial OS=Rattus norvegicus OX=10116 GN=Acat1 PE=1 SV=1	P17764	Acat1	45 kDa		3				3			2
Aconitate hydratase, mitochondrial OS=Rattus norvegicus OX=10116 GN=Aco2 PE=1 SV=2	Q9ER34	Aco2	85 kDa		31	3	25	36	48	33	22	35	3
Actin, alpha cardiac muscle 1 OS=Rattus norvegicus OX=10116 GN=Actc1 PE=2 SV=1	P68035 (+1)	Actc1	42 kDa	TRUE	42				28		22			14						17
Actin, aortic smooth muscle OS=Rattus norvegicus OX=10116 GN=Acta2 PE=2 SV=1	P62738 (+3)	Acta2	42 kDa	TRUE			9	18
Actin, cytoplasmic 1 OS=Rattus norvegicus OX=10116 GN=Actb PE=1 SV=1	P60711 (+1)	Actb	42 kDa	TRUE	73	13	14	25	58	37	29	31	8	26	6		11		15	27	2	13	16
Actin-related protein 3 OS=Rattus norvegicus OX=10116 GN=Actr3 PE=1 SV=1	Q4V7C7	Actr3	47 kDa						1			1
Acylamino-acid-releasing enzyme OS=Rattus norvegicus OX=10116 GN=Apeh PE=1 SV=1	P13676	Apeh	81 kDa				3			5	6
Adenosine 5'-monophosphoramidase HINT1 OS=Rattus norvegicus OX=10116 GN=Hint1 PE=1 SV=5	P62959	Hint1	14 kDa						2			2											2
Adenylyl cyclase-associated protein 1 OS=Rattus norvegicus OX=10116 GN=Cap1 PE=1 SV=3	Q08163	Cap1	52 kDa	TRUE	2				2
ADP/ATP translocase 1 OS=Rattus norvegicus OX=10116 GN=Slc25a4 PE=1 SV=3	Q05962	Slc25a4	33 kDa	TRUE	18	3		6	26			7								1
ADP/ATP translocase 2 OS=Rattus norvegicus OX=10116 GN=Slc25a5 PE=1 SV=3	Q09073	Slc25a5	33 kDa	TRUE	15				21		2	6
ADP-ribosylation factor 3 OS=Rattus norvegicus OX=10116 GN=Arf3 PE=2 SV=2	P61206 (+1)	Arf3	21 kDa	TRUE	5			2	5
Afamin OS=Rattus norvegicus OX=10116 GN=Afm PE=3 SV=1	P36953	Afm	69 kDa						9	23	23	10					3		2	1
A-kinase anchor protein 5 OS=Rattus norvegicus OX=10116 GN=Akap5 PE=1 SV=2	P24587	Akap5	76 kDa					3				1
Albumin OS=Rattus norvegicus OX=10116 GN=Alb PE=1 SV=2	P02770	Alb	69 kDa		147	71	70	80	163	211	245	145	43	77	82	92	132	89	133	134	87	82	131
Aldehyde dehydrogenase, mitochondrial OS=Rattus norvegicus OX=10116 GN=Aldh2 PE=1 SV=1	P11884	Aldh2	56 kDa				3	5
Aldo-keto reductase family 1 member A1 OS=Rattus norvegicus OX=10116 GN=Akr1a1 PE=1 SV=2	P51635	Akr1a1	37 kDa				1	2	1
Aldo-keto reductase family 1 member B1 OS=Rattus norvegicus OX=10116 GN=Akr1b1 PE=1 SV=3	P07943	Akr1b1	36 kDa		3				3	3	1	4
Alpha-1-acid glycoprotein OS=Rattus norvegicus OX=10116 GN=Orm1 PE=2 SV=1	P02764	Orm1	24 kDa						1	6	6	4
Alpha-1-antiproteinase OS=Rattus norvegicus OX=10116 GN=Serpina1 PE=1 SV=2	P17475	Serpina1	46 kDa		14	9			21	26	25	14		2	2		1	4	24	22	3	4	14
Alpha-1B-glycoprotein OS=Rattus norvegicus OX=10116 GN=A1bg PE=2 SV=2	Q9EPH1	A1bg	56 kDa		11	5				16	18	9						2	6	11			4
Alpha-1-inhibitor 3 OS=Rattus norvegicus OX=10116 GN=A1i3 PE=1 SV=1	P14046	A1i3	164 kDa	TRUE	61	26	10	21	132	103	68	37		4	9		8	9	38	37		10	35
Alpha-1-macroglobulin OS=Rattus norvegicus OX=10116 GN=A1m PE=1 SV=1	Q63041	A1m	167 kDa		40	13	13	18	96	113	62	45	2	3	2	4	9	6	7	9	17	11	22
Alpha-2-HS-glycoprotein OS=Rattus norvegicus OX=10116 GN=Ahsg PE=1 SV=2	P24090	Ahsg	38 kDa		15	4	2	4	10	7	4	3					4		10	9		2	11
Alpha-adducin OS=Rattus norvegicus OX=10116 GN=Add1 PE=1 SV=2	Q63028	Add1	80 kDa	TRUE	3							2
Alpha-enolase OS=Rattus norvegicus OX=10116 GN=Eno1 PE=1 SV=4	P04764	Eno1	47 kDa	TRUE	45	2	17	15	35	29	13	20		2			4		9	1			11
Alpha-internexin OS=Rattus norvegicus OX=10116 GN=Ina PE=1 SV=2	P23565	Ina	56 kDa	TRUE	7				29			4			1					16
Alpha-synuclein OS=Rattus norvegicus OX=10116 GN=Snca PE=1 SV=1	P37377	Snca	15 kDa	TRUE	22						3	18
Amphiphysin OS=Rattus norvegicus OX=10116 GN=Amph PE=1 SV=1	O08838	Amph	75 kDa	TRUE	4			2
Amyloid-beta precursor protein OS=Rattus norvegicus OX=10116 GN=App PE=1 SV=2	P08592	App	87 kDa	TRUE															2	5			4
Angiotensinogen OS=Rattus norvegicus OX=10116 GN=Agt PE=1 SV=1	P01015	Agt	52 kDa							2									21	25		4	11
Ankyrin-3 OS=Rattus norvegicus OX=10116 GN=Ank3 PE=1 SV=3	O70511	Ank3	284 kDa		2				2
Annexin A2 OS=Rattus norvegicus OX=10116 GN=Anxa2 PE=1 SV=2	Q07936	Anxa2	39 kDa											15	2		4		3
Annexin A5 OS=Rattus norvegicus OX=10116 GN=Anxa5 PE=1 SV=3	P14668	Anxa5	36 kDa		3		2		1
AP-2 complex subunit alpha-2 OS=Rattus norvegicus OX=10116 GN=Ap2a2 PE=1 SV=3	P18484	Ap2a2	104 kDa		13				5
AP-2 complex subunit beta OS=Rattus norvegicus OX=10116 GN=Ap2b1 PE=1 SV=1	P62944	Ap2b1	105 kDa	TRUE	16				4			2
AP-2 complex subunit mu OS=Rattus norvegicus OX=10116 GN=Ap2m1 PE=1 SV=1	P84092	Ap2m1	50 kDa		6				4	2
Apolipoprotein A-I OS=Rattus norvegicus OX=10116 GN=Apoa1 PE=1 SV=2	P04639	Apoa1	30 kDa		7					9	2	5			1
Apolipoprotein A-II OS=Rattus norvegicus OX=10116 GN=Apoa2 PE=2 SV=1	P04638	Apoa2	11 kDa		1	1													2
Apolipoprotein A-IV OS=Rattus norvegicus OX=10116 GN=Apoa4 PE=1 SV=2	P02651	Apoa4	44 kDa		4						5								6	1
Apolipoprotein E OS=Rattus norvegicus OX=10116 GN=Apoe PE=1 SV=2	P02650	Apoe	36 kDa	TRUE	17				4	7	2	3							20	10		5	11
Arginase-1 OS=Rattus norvegicus OX=10116 GN=Arg1 PE=1 SV=2	P07824	Arg1	35 kDa											3	1		1
Aspartate aminotransferase, cytoplasmic OS=Rattus norvegicus OX=10116 GN=Got1 PE=1 SV=3	P13221	Got1	46 kDa		17		15	17	24	24	15	16	5							2
Aspartate aminotransferase, mitochondrial OS=Rattus norvegicus OX=10116 GN=Got2 PE=1 SV=2	P00507	Got2	47 kDa		36		6	28	29	22	20	26
ATP synthase F(0) complex subunit B1, mitochondrial OS=Rattus norvegicus OX=10116 GN=Atp5pb PE=1 SV=1	P19511	Atp5pb	29 kDa		6			1	5
ATP synthase subunit alpha, mitochondrial OS=Rattus norvegicus OX=10116 GN=Atp5f1a PE=1 SV=2	P15999	Atp5f1a	60 kDa		67	7	10	12	52	3	19	26	1							11		4
ATP synthase subunit beta, mitochondrial OS=Rattus norvegicus OX=10116 GN=Atp5f1b PE=1 SV=2	P10719	Atp5f1b	56 kDa		76	11	8	23	61	23	28	29		2						8
ATP synthase subunit d, mitochondrial OS=Rattus norvegicus OX=10116 GN=Atp5pd PE=1 SV=3	P31399	Atp5pd	19 kDa		11			1	5
ATP synthase subunit delta, mitochondrial OS=Rattus norvegicus OX=10116 GN=Atp5f1d PE=1 SV=2	P35434	Atp5f1d	18 kDa		4			2	4			2
ATP synthase subunit e, mitochondrial OS=Rattus norvegicus OX=10116 GN=Atp5me PE=1 SV=3	P29419	Atp5me	8 kDa	TRUE	5				6			2
ATP synthase subunit f, mitochondrial OS=Rattus norvegicus OX=10116 GN=Atp5mf PE=1 SV=1	D3ZAF6	Atp5mf	10 kDa		3				4
ATP synthase subunit gamma, mitochondrial OS=Rattus norvegicus OX=10116 GN=Atp5f1c PE=1 SV=2	P35435	Atp5f1c	30 kDa		15	2			10			5
ATP synthase subunit O, mitochondrial OS=Rattus norvegicus OX=10116 GN=Atp5po PE=1 SV=1	Q06647	Atp5po	23 kDa		13				14			3
ATP synthase-coupling factor 6, mitochondrial OS=Rattus norvegicus OX=10116 GN=Atp5pf PE=1 SV=1	P21571	Atp5pf	12 kDa		5			1	5			4
ATP-dependent 6-phosphofructokinase, muscle type OS=Rattus norvegicus OX=10116 GN=Pfkm PE=1 SV=3	P47858	Pfkm	86 kDa	TRUE	4				5
ATP-dependent 6-phosphofructokinase, platelet type OS=Rattus norvegicus OX=10116 GN=Pfkp PE=1 SV=2	P47860	Pfkp	86 kDa	TRUE	2				1
Band 3 anion transport protein OS=Rattus norvegicus OX=10116 GN=Slc4a1 PE=1 SV=3	P23562	Slc4a1	103 kDa		27	4		2	14	5	10	5							4	5		2	18
Band 4.1-like protein 1 OS=Rattus norvegicus OX=10116 GN=Epb41l1 PE=1 SV=1	Q9WTP0	Epb41l1	98 kDa						2			1
Beta-2-glycoprotein 1 OS=Rattus norvegicus OX=10116 GN=Apoh PE=2 SV=2	P26644	Apoh	33 kDa			1			2										5	6
Beta-2-microglobulin OS=Rattus norvegicus OX=10116 GN=B2m PE=1 SV=1	P07151	B2m	14 kDa																4	3			2
Beta-enolase OS=Rattus norvegicus OX=10116 GN=Eno3 PE=1 SV=3	P15429	Eno3	47 kDa	TRUE	16				14	15
Beta-soluble NSF attachment protein OS=Rattus norvegicus OX=10116 GN=Napb PE=1 SV=1	P85969	Napb	33 kDa		3							2
Beta-synuclein OS=Rattus norvegicus OX=10116 GN=Sncb PE=1 SV=1	Q63754	Sncb	15 kDa	TRUE	15						3	10
Bleomycin hydrolase OS=Rattus norvegicus OX=10116 GN=Blmh PE=1 SV=1	P70645	Blmh	52 kDa							6							2
Brain acid soluble protein 1 OS=Rattus norvegicus OX=10116 GN=Basp1 PE=1 SV=2	Q05175	Basp1	22 kDa		27	2	11	20	26	13	12	21	4		5	1	2		4	5		9
Brevican core protein OS=Rattus norvegicus OX=10116 GN=Bcan PE=1 SV=2	P55068	Bcan	96 kDa		2			2	1											2
Cadherin-2 OS=Rattus norvegicus OX=10116 GN=Cdh2 PE=1 SV=1	Q9Z1Y3	Cdh2	100 kDa																3	1
Calcium/calmodulin-dependent protein kinase type II subunit alpha OS=Rattus norvegicus OX=10116 GN=Camk2a PE=1 SV=1	P11275	Camk2a	54 kDa	TRUE	36	2	1	6	24		11	18								7
Calcium/calmodulin-dependent protein kinase type II subunit beta OS=Rattus norvegicus OX=10116 GN=Camk2b PE=1 SV=1	P08413	Camk2b	60 kDa	TRUE	22				14			8
Calcium/calmodulin-dependent protein kinase type II subunit delta OS=Rattus norvegicus OX=10116 GN=Camk2d PE=1 SV=1	P15791	Camk2d	60 kDa	TRUE	15				11
Calmodulin regulator protein PCP4 OS=Rattus norvegicus OX=10116 GN=Pcp4 PE=1 SV=2	P63055	Pcp4	7 kDa		3		5	5		1	4	5
Calmodulin-1 OS=Rattus norvegicus OX=10116 GN=Calm1 PE=1 SV=1	P0DP29 (+2)	Calm1	17 kDa	TRUE	22		19	19	14	10	9	9	3	1
Calnexin OS=Rattus norvegicus OX=10116 GN=Canx PE=1 SV=1	P35565	Canx	67 kDa		2				1
Calreticulin OS=Rattus norvegicus OX=10116 GN=Calr PE=1 SV=1	P18418	Calr	48 kDa				2	6		2		1
Calretinin OS=Rattus norvegicus OX=10116 GN=Calb2 PE=1 SV=1	P47728	Calb2	31 kDa	TRUE					4	3
CaM kinase-like vesicle-associated protein OS=Rattus norvegicus OX=10116 GN=Camkv PE=1 SV=1	Q63092	Camkv	54 kDa		3							2
Carbamoyl-phosphate synthase [ammonia], mitochondrial OS=Rattus norvegicus OX=10116 GN=Cps1 PE=1 SV=1	P07756	Cps1	165 kDa												4						1
Carbonic anhydrase 1 OS=Rattus norvegicus OX=10116 GN=Ca1 PE=1 SV=1	B0BNN3	Ca1	28 kDa		27	12	16	9	18	34	17	16	3						7	14	3	3	15
Carbonic anhydrase 2 OS=Rattus norvegicus OX=10116 GN=Ca2 PE=1 SV=2	P27139	Ca2	29 kDa		16	6	5	4	17	36	12	9	2						8	9	3	1	10
Carboxylesterase 1C OS=Rattus norvegicus OX=10116 GN=Ces1c PE=1 SV=3	P10959	Ces1c	60 kDa	TRUE	2	2			7	25	26	15					4		8	11			2
Carboxypeptidase E OS=Rattus norvegicus OX=10116 GN=Cpe PE=1 SV=1	P15087	Cpe	53 kDa																11	12			2
Catalase OS=Rattus norvegicus OX=10116 GN=Cat PE=1 SV=3	P04762	Cat	60 kDa		6		1			5													8
Cathepsin B OS=Rattus norvegicus OX=10116 GN=Ctsb PE=1 SV=2	P00787	Ctsb	37 kDa																3	2
Cathepsin Z OS=Rattus norvegicus OX=10116 GN=Ctsz PE=1 SV=2	Q9R1T3	Ctsz	34 kDa																		2
Cationic trypsin-3 OS=Rattus norvegicus OX=10116 GN=Try3 PE=2 SV=1	P08426	Try3	26 kDa				4	4	4				1	1	3			4	2	4	4		3
CD9 antigen OS=Rattus norvegicus OX=10116 GN=Cd9 PE=1 SV=2	P40241	Cd9	25 kDa						2			2
CDGSH iron-sulfur domain-containing protein 1 OS=Rattus norvegicus OX=10116 GN=Cisd1 PE=3 SV=1	B0K020	Cisd1	12 kDa		2				5
Cell cycle exit and neuronal differentiation protein 1 OS=Rattus norvegicus OX=10116 GN=Cend1 PE=1 SV=1	Q5FVI4	Cend1	15 kDa		7			3	11		2	7
Cell division control protein 42 homolog OS=Rattus norvegicus OX=10116 GN=Cdc42 PE=1 SV=2	Q8CFN2	Cdc42	21 kDa	TRUE	1				5
Ceruloplasmin OS=Rattus norvegicus OX=10116 GN=Cp PE=1 SV=3	P13635	Cp	121 kDa	TRUE	9	6	2	1	39	54	45	18		3		3	12	9	18	13	25	9	26
Chromogranin-A OS=Rattus norvegicus OX=10116 GN=Chga PE=1 SV=1	P10354	Chga	52 kDa																3	5
Chronophin OS=Rattus norvegicus OX=10116 GN=Pdxp PE=1 SV=2	Q8VD52	Pdxp	33 kDa		2				2			3
Citrate synthase, mitochondrial OS=Rattus norvegicus OX=10116 GN=Cs PE=1 SV=1	Q8VHF5	Cs	52 kDa		17		7	11	13	17	6	9	1
Clathrin coat assembly protein AP180 OS=Rattus norvegicus OX=10116 GN=Snap91 PE=1 SV=1	Q05140	Snap91	94 kDa	TRUE	8							1
Clathrin heavy chain 1 OS=Rattus norvegicus OX=10116 GN=Cltc PE=1 SV=3	P11442	Cltc	192 kDa		69	2	1	7	75	3	2	13								1
Clathrin light chain A OS=Rattus norvegicus OX=10116 GN=Clta PE=1 SV=1	P08081	Clta	27 kDa		4		1	5	3	4		5
Clathrin light chain B OS=Rattus norvegicus OX=10116 GN=Cltb PE=1 SV=1	P08082	Cltb	25 kDa		7		1	2	6			6
Claudin-11 OS=Rattus norvegicus OX=10116 GN=Cldn11 PE=1 SV=1	Q99P82	Cldn11	22 kDa						4			4								2
Clusterin OS=Rattus norvegicus OX=10116 GN=Clu PE=1 SV=2	P05371	Clu	51 kDa																26	21			20
Coactosin-like protein OS=Rattus norvegicus OX=10116 GN=Cotl1 PE=1 SV=1	B0BNA5	Cotl1	16 kDa					1	4
Cofilin-1 OS=Rattus norvegicus OX=10116 GN=Cfl1 PE=1 SV=3	P45592	Cfl1	19 kDa	TRUE	9	2		4	13	5		5		2						2
Collagen alpha-1(I) chain OS=Rattus norvegicus OX=10116 GN=Col1a1 PE=1 SV=5	P02454	Col1a1	138 kDa						3	2	2				4		2				4
Complement C3 OS=Rattus norvegicus OX=10116 GN=C3 PE=1 SV=3	P01026	C3	186 kDa	TRUE	40	32	7	10	56	76	61	30				5	25	10	48	75	7	10	15
Complement C4 OS=Rattus norvegicus OX=10116 GN=C4 PE=1 SV=3	P08649	C4	192 kDa							2									3
Complement component 1 Q subcomponent-binding protein, mitochondrial OS=Rattus norvegicus OX=10116 GN=C1qbp PE=1 SV=2	O35796	C1qbp	31 kDa		2		1	3	1		2	4
Contactin-1 OS=Rattus norvegicus OX=10116 GN=Cntn1 PE=1 SV=2	Q63198	Cntn1	113 kDa		19			4	10			5							10	5		2
Cornifin-A OS=Rattus norvegicus OX=10116 GN=Sprr1a PE=2 SV=1	Q63532	Sprr1a	17 kDa											2			1		2
Coronin-1A OS=Rattus norvegicus OX=10116 GN=Coro1a PE=1 SV=3	Q91ZN1	Coro1a	51 kDa		3				3
Corticosteroid-binding globulin OS=Rattus norvegicus OX=10116 GN=Serpina6 PE=1 SV=2	P31211	Serpina6	45 kDa		1				2	15	12	10							1	2
C-reactive protein OS=Rattus norvegicus OX=10116 GN=Crp PE=1 SV=1	P48199	Crp	25 kDa						3	11	3	3			6						2	6	2
Creatine kinase B-type OS=Rattus norvegicus OX=10116 GN=Ckb PE=1 SV=2	P07335	Ckb	43 kDa	TRUE	41	8	11	13	44	25	16	16	4	4					12	11			9
Creatine kinase U-type, mitochondrial OS=Rattus norvegicus OX=10116 GN=Ckmt1 PE=1 SV=1	P25809	Ckmt1	47 kDa	TRUE	15		4	5	7		4	8								1
Cystatin-C OS=Rattus norvegicus OX=10116 GN=Cst3 PE=1 SV=2	P14841	Cst3	15 kDa		4		2	2	7		1	3							34	26	8	6	13
Cytochrome b-c1 complex subunit 1, mitochondrial OS=Rattus norvegicus OX=10116 GN=Uqcrc1 PE=1 SV=1	Q68FY0	Uqcrc1	53 kDa	TRUE	11				8
Cytochrome b-c1 complex subunit 2, mitochondrial OS=Rattus norvegicus OX=10116 GN=Uqcrc2 PE=1 SV=2	P32551	Uqcrc2	48 kDa		18			1	13			3
Cytochrome b-c1 complex subunit 6, mitochondrial OS=Rattus norvegicus OX=10116 GN=Uqcrh PE=3 SV=1	Q5M9I5	Uqcrh	10 kDa		2				2
Cytochrome b-c1 complex subunit Rieske, mitochondrial OS=Rattus norvegicus OX=10116 GN=Uqcrfs1 PE=1 SV=2	P20788	Uqcrfs1	29 kDa		7			2	6
Cytochrome c oxidase subunit 2 OS=Rattus norvegicus OX=10116 GN=Mtco2 PE=1 SV=3	P00406	Mtco2	26 kDa		4					1		2
Cytochrome c oxidase subunit 4 isoform 1, mitochondrial OS=Rattus norvegicus OX=10116 GN=Cox4i1 PE=1 SV=1	P10888	Cox4i1	20 kDa		11			3	8			2
Cytochrome c oxidase subunit 5A, mitochondrial OS=Rattus norvegicus OX=10116 GN=Cox5a PE=1 SV=1	P11240	Cox5a	16 kDa		7				4			2
Cytochrome c oxidase subunit 5B, mitochondrial OS=Rattus norvegicus OX=10116 GN=Cox5b PE=1 SV=2	P12075	Cox5b	14 kDa		5			1
Cytochrome c oxidase subunit 6C-2 OS=Rattus norvegicus OX=10116 GN=Cox6c2 PE=1 SV=3	P11951	Cox6c2	8 kDa		4			2	2			2
Cytochrome c, somatic OS=Rattus norvegicus OX=10116 GN=Cycs PE=1 SV=2	P62898	Cycs	12 kDa		11	2	8	14	12	5		4	7	2						4
Cytosolic acyl coenzyme A thioester hydrolase OS=Rattus norvegicus OX=10116 GN=Acot7 PE=1 SV=4	Q64559	Acot7	43 kDa		3				4
D-dopachrome decarboxylase OS=Rattus norvegicus OX=10116 GN=Ddt PE=1 SV=3	P80254	Ddt	13 kDa				2	1
Desmoplakin OS=Rattus norvegicus OX=10116 GN=Dsp PE=1 SV=1	F1LMV6	Dsp	332 kDa	TRUE		3	6	1		1	21	2	1	92	9		57	2	4
Dihydrolipoyl dehydrogenase, mitochondrial OS=Rattus norvegicus OX=10116 GN=Dld PE=1 SV=1	Q6P6R2	Dld	54 kDa		7		10	15	14			1	3
Dihydrolipoyllysine-residue acetyltransferase component of pyruvate dehydrogenase complex, mitochondrial OS=Rattus norvegicus OX=10116 GN=Dlat PE=1 SV=3	P08461	Dlat	67 kDa		14		2	6	18		1	5
Dihydrolipoyllysine-residue succinyltransferase component of 2-oxoglutarate dehydrogenase complex, mitochondrial OS=Rattus norvegicus OX=10116 GN=Dlst PE=1 SV=2	Q01205	Dlst	49 kDa						3			1
Dihydropteridine reductase OS=Rattus norvegicus OX=10116 GN=Qdpr PE=1 SV=1	P11348	Qdpr	26 kDa						10			5
Dihydropyrimidinase-related protein 1 OS=Rattus norvegicus OX=10116 GN=Crmp1 PE=1 SV=1	Q62950	Crmp1	62 kDa	TRUE	14				10			7
Dihydropyrimidinase-related protein 2 OS=Rattus norvegicus OX=10116 GN=Dpysl2 PE=1 SV=1	P47942	Dpysl2	62 kDa	TRUE	61	1	13	26	53	6	23	33	7	6						4		5
Dihydropyrimidinase-related protein 3 OS=Rattus norvegicus OX=10116 GN=Dpysl3 PE=1 SV=2	Q62952	Dpysl3	62 kDa	TRUE	13				8			7
Dihydropyrimidinase-related protein 5 OS=Rattus norvegicus OX=10116 GN=Dpysl5 PE=1 SV=1	Q9JHU0	Dpysl5	62 kDa		2				3
Dynamin-1 OS=Rattus norvegicus OX=10116 GN=Dnm1 PE=1 SV=2	P21575	Dnm1	97 kDa	TRUE	51				26	2	2	11
Dynamin-1-like protein OS=Rattus norvegicus OX=10116 GN=Dnm1l PE=1 SV=1	O35303	Dnm1l	84 kDa		7							2
Ectonucleotide pyrophosphatase/phosphodiesterase family member 2 OS=Rattus norvegicus OX=10116 GN=Enpp2 PE=1 SV=2	Q64610	Enpp2	102 kDa																72	60	7	10	25
Electrogenic aspartate/glutamate antiporter SLC25A12, mitochondrial OS=Rattus norvegicus OX=10116 GN=Slc25a12 PE=3 SV=5	F1LX07	Slc25a12	74 kDa	TRUE	10				18			2
Electrogenic aspartate/glutamate antiporter SLC25A13, mitochondrial OS=Rattus norvegicus OX=10116 GN=Slc25a13 PE=3 SV=4	F1LZW6	Slc25a13	74 kDa	TRUE					6
Elongation factor 1-alpha 1 OS=Rattus norvegicus OX=10116 GN=Eef1a1 PE=2 SV=1	P62630	Eef1a1	50 kDa	TRUE	8			2	13		2			10
Elongation factor 1-alpha 2 OS=Rattus norvegicus OX=10116 GN=Eef1a2 PE=1 SV=1	P62632	Eef1a2	50 kDa	TRUE	6				11
Elongation factor Tu, mitochondrial OS=Rattus norvegicus OX=10116 GN=Tufm PE=1 SV=1	P85834	Tufm	50 kDa		8				7			3
Endophilin-A1 OS=Rattus norvegicus OX=10116 GN=Sh3gl2 PE=1 SV=2	O35179	Sh3gl2	40 kDa	TRUE	11				3			8
Endoplasmic reticulum chaperone BiP OS=Rattus norvegicus OX=10116 GN=Hspa5 PE=1 SV=1	P06761	Hspa5	72 kDa	TRUE	13		4	6	7		3	9		4
Enoyl-CoA hydratase, mitochondrial OS=Rattus norvegicus OX=10116 GN=Echs1 PE=1 SV=1	P14604	Echs1	32 kDa				1					6
ES1 protein homolog, mitochondrial OS=Rattus norvegicus OX=10116 PE=1 SV=2	P56571		28 kDa		2				1			2
Excitatory amino acid transporter 1 OS=Rattus norvegicus OX=10116 GN=Slc1a3 PE=1 SV=2	P24942	Slc1a3	60 kDa		12				11	1		2
Excitatory amino acid transporter 2 OS=Rattus norvegicus OX=10116 GN=Slc1a2 PE=1 SV=2	P31596	Slc1a2	62 kDa		36		8	14	24	8	6	11	4							6
Fascin OS=Rattus norvegicus OX=10116 GN=Fscn1 PE=1 SV=2	P85845	Fscn1	54 kDa		9		4	7	2	8		8
Fetuin-B OS=Rattus norvegicus OX=10116 GN=Fetub PE=2 SV=2	Q9QX79	Fetub	42 kDa		4	8			6	3	6	4						2	13	19		2	8
Fibrinogen alpha chain OS=Rattus norvegicus OX=10116 GN=Fga PE=1 SV=3	P06399	Fga	87 kDa		9	6					4	5						3		15		4	13
Fibrinogen beta chain OS=Rattus norvegicus OX=10116 GN=Fgb PE=1 SV=4	P14480	Fgb	54 kDa		3	3						5								12			7
Fibrinogen gamma chain OS=Rattus norvegicus OX=10116 GN=Fgg PE=1 SV=3	P02680	Fgg	51 kDa		5	2						2						1		23			11
Fructose-bisphosphate aldolase A OS=Rattus norvegicus OX=10116 GN=Aldoa PE=1 SV=2	P05065	Aldoa	39 kDa	TRUE	45	8	18	25	38	36	24	34	6	5					4	7			2
Fructose-bisphosphate aldolase C OS=Rattus norvegicus OX=10116 GN=Aldoc PE=1 SV=3	P09117	Aldoc	39 kDa	TRUE	26	1	14	16	29	13	16	20	2
Galectin-5 OS=Rattus norvegicus OX=10116 GN=Lgals5 PE=1 SV=2	P47967	Lgals5	16 kDa		8				1	10												1	2
Gamma-enolase OS=Rattus norvegicus OX=10116 GN=Eno2 PE=1 SV=2	P07323	Eno2	47 kDa	TRUE	58	4	25	23	42	41	14	20	4	5			3						3
Gelsolin OS=Rattus norvegicus OX=10116 GN=Gsn PE=1 SV=1	Q68FP1	Gsn	86 kDa		1				1		3								19	16			6
Glial fibrillary acidic protein OS=Rattus norvegicus OX=10116 GN=Gfap PE=1 SV=2	P47819	Gfap	50 kDa	TRUE	2				7											2			5
Glucose-6-phosphate isomerase OS=Rattus norvegicus OX=10116 GN=Gpi PE=1 SV=1	Q6P6V0	Gpi	63 kDa		8				14	15	2	4
Glutamate dehydrogenase 1, mitochondrial OS=Rattus norvegicus OX=10116 GN=Glud1 PE=1 SV=2	P10860	Glud1	61 kDa		29		17	28	28	11	17	21	2
Glutamine synthetase OS=Rattus norvegicus OX=10116 GN=Glul PE=1 SV=3	P09606	Glul	42 kDa		14		6	14	24	5	3	5
Glutathione peroxidase 1 OS=Rattus norvegicus OX=10116 GN=Gpx1 PE=1 SV=4	P04041	Gpx1	22 kDa		3		5			13													3
Glutathione peroxidase 3 OS=Rattus norvegicus OX=10116 GN=Gpx3 PE=2 SV=2	P23764	Gpx3	25 kDa						1	3
Glutathione S-transferase LANCL1 OS=Rattus norvegicus OX=10116 GN=Lancl1 PE=1 SV=2	Q9QX69	Lancl1	45 kDa				4	4				2
Glutathione S-transferase Mu 1 OS=Rattus norvegicus OX=10116 GN=Gstm1 PE=1 SV=2	P04905	Gstm1	26 kDa	TRUE	4		2	5	9	1	7	4
Glutathione S-transferase Mu 7 OS=Rattus norvegicus OX=10116 GN=Gstm7 PE=1 SV=2	P08009	Gstm7	26 kDa	TRUE	2			3	17	3	7	5
Glutathione S-transferase P OS=Rattus norvegicus OX=10116 GN=Gstp1 PE=1 SV=2	P04906	Gstp1	23 kDa		3			4	8		4	4		1
Glyceraldehyde-3-phosphate dehydrogenase OS=Rattus norvegicus OX=10116 GN=Gapdh PE=1 SV=3	P04797	Gapdh	36 kDa	TRUE	45	2	6	10	28	5	11	15		6			1		7	3			5
Glycogen phosphorylase, brain form (Fragment) OS=Rattus norvegicus OX=10116 GN=Pygb PE=1 SV=3	P53534	Pygb	96 kDa	TRUE	9			2	15			1
GTP-binding nuclear protein Ran OS=Rattus norvegicus OX=10116 GN=Ran PE=1 SV=3	P62828	Ran	24 kDa		2				3														2
Guanine deaminase OS=Rattus norvegicus OX=10116 GN=Gda PE=1 SV=1	Q9WTT6	Gda	51 kDa		9	2	5	6	19	16	3	6											5
Guanine nucleotide-binding protein G(i) subunit alpha-1 OS=Rattus norvegicus OX=10116 GN=Gnai1 PE=1 SV=3	P10824	Gnai1	40 kDa	TRUE	8				15
Guanine nucleotide-binding protein G(i) subunit alpha-2 OS=Rattus norvegicus OX=10116 GN=Gnai2 PE=1 SV=3	P04897	Gnai2	41 kDa	TRUE	5				20
Guanine nucleotide-binding protein G(I)/G(S)/G(T) subunit beta-1 OS=Rattus norvegicus OX=10116 GN=Gnb1 PE=1 SV=4	P54311	Gnb1	37 kDa	TRUE	23		2	4	28	8		9								3
Guanine nucleotide-binding protein G(I)/G(S)/G(T) subunit beta-2 OS=Rattus norvegicus OX=10116 GN=Gnb2 PE=1 SV=4	P54313	Gnb2	37 kDa	TRUE	20			3	16		2	10
Guanine nucleotide-binding protein G(o) subunit alpha OS=Rattus norvegicus OX=10116 GN=Gnao1 PE=1 SV=2	P59215	Gnao1	40 kDa	TRUE	47	2	4	12	33	10	6	14								4
Guanine nucleotide-binding protein G(q) subunit alpha OS=Rattus norvegicus OX=10116 GN=Gnaq PE=2 SV=2	P82471	Gnaq	42 kDa	TRUE	4				3
Haptoglobin OS=Rattus norvegicus OX=10116 GN=Hp PE=1 SV=3	P06866	Hp	39 kDa		2						3	8					4	3	8	2	3	1	5
Heat shock 70 kDa protein 4 OS=Rattus norvegicus OX=10116 GN=Hspa4 PE=1 SV=1	O88600	Hspa4	94 kDa	TRUE	3			1	7			2
Heat shock cognate 71 kDa protein OS=Rattus norvegicus OX=10116 GN=Hspa8 PE=1 SV=1	P63018	Hspa8	71 kDa	TRUE	70	7	15	25	58	15	12	26	2	4	1				8	10			11
Heat shock protein 105 kDa OS=Rattus norvegicus OX=10116 GN=Hsph1 PE=1 SV=1	Q66HA8	Hsph1	96 kDa	TRUE	6				1
Heat shock protein HSP 90-alpha OS=Rattus norvegicus OX=10116 GN=Hsp90aa1 PE=1 SV=3	P82995	Hsp90aa1	85 kDa	TRUE	22		4	8	24	3	6	11
Heat shock protein HSP 90-beta OS=Rattus norvegicus OX=10116 GN=Hsp90ab1 PE=1 SV=4	P34058	Hsp90ab1	83 kDa	TRUE	21			8	18			10
Hemoglobin subunit alpha-1/2 OS=Rattus norvegicus OX=10116 GN=Hba1 PE=1 SV=3	P01946	Hba1	15 kDa		118	37	35	28	73	153	48	52	13	21	11	31	16	16	35	45	18	30	89
Hemoglobin subunit beta-1 OS=Rattus norvegicus OX=10116 GN=Hbb PE=1 SV=3	P02091	Hbb	16 kDa	TRUE	179	32	50	33	86	188	52	63	15	21	21	15	13	18	34	46	22	42	112
Hemoglobin subunit beta-2 OS=Rattus norvegicus OX=10116 PE=1 SV=2	P11517		16 kDa	TRUE	89	19	36	20	64	126	35	36	8	15	13	11	6	11	26	27	11	29	61
Hemopexin OS=Rattus norvegicus OX=10116 GN=Hpx PE=1 SV=3	P20059	Hpx	51 kDa		22	10	7	11	36	58	61	31		2	3		8		39	30	8	3	25
Heterogeneous nuclear ribonucleoproteins A2/B1 OS=Rattus norvegicus OX=10116 GN=Hnrnpa2b1 PE=1 SV=1	A7VJC2	Hnrnpa2b1	37 kDa		1			4	3
Hexokinase-1 OS=Rattus norvegicus OX=10116 GN=Hk1 PE=1 SV=4	P05708	Hk1	102 kDa	TRUE	29			8	34			2
Histone H1.4 OS=Rattus norvegicus OX=10116 GN=H1-4 PE=1 SV=3	P15865	H1-4	22 kDa	TRUE	6		2	4	6	6	4	4			5					3
Histone H2A.J OS=Rattus norvegicus OX=10116 GN=H2aj PE=2 SV=1	A9UMV8 (+7)	H2aj	14 kDa	TRUE			3	3	6														2
Histone H2B type 1 OS=Rattus norvegicus OX=10116 PE=1 SV=2	Q00715		14 kDa		7		2	2	10	4	3	3			2			2		5
Histone H3.3 OS=Rattus norvegicus OX=10116 GN=H3-3b PE=1 SV=2	P84245	H3-3b	15 kDa		3				2	2	1	2
Histone H4 OS=Rattus norvegicus OX=10116 GN=H4c2 PE=1 SV=2	P62804	H4c2	11 kDa		12	2	5		10	1	6	7		1					3	8			2
Hyaluronan and proteoglycan link protein 1 OS=Rattus norvegicus OX=10116 GN=Hapln1 PE=1 SV=2	P03994	Hapln1	40 kDa		2							6
Hydroxyacylglutathione hydrolase, mitochondrial OS=Rattus norvegicus OX=10116 GN=Hagh PE=1 SV=2	O35952	Hagh	34 kDa				1			2	1	1
Ig gamma-1 chain C region OS=Rattus norvegicus OX=10116 PE=1 SV=1	P20759		36 kDa	TRUE			3		8	10	11	7						4		4	5		4
Ig gamma-2A chain C region OS=Rattus norvegicus OX=10116 GN=Igg-2a PE=1 SV=1	P20760	Igg-2a	35 kDa	TRUE	19	12	5	4	23	40	34	26	2	2	7	7	16	7	14	15	7	6	8
Ig gamma-2B chain C region OS=Rattus norvegicus OX=10116 GN=Igh-1a PE=1 SV=1	P20761	Igh-1a	36 kDa		7				7	16	15	7								2	2
Ig kappa chain C region, A allele OS=Rattus norvegicus OX=10116 PE=1 SV=1	P01836		12 kDa	TRUE	13					18	17	5				4	6		2	5			5
Ig kappa chain C region, B allele OS=Rattus norvegicus OX=10116 PE=1 SV=1	P01835		12 kDa	TRUE					11	21				2
Ig lambda-2 chain C region OS=Rattus norvegicus OX=10116 PE=4 SV=1	P20767		11 kDa		1					11	5
Immunoglobulin superfamily member 1 OS=Rattus norvegicus OX=10116 GN=Igsf1 PE=1 SV=1	Q925N6	Igsf1	147 kDa																2	1
Insulin-like growth factor II OS=Rattus norvegicus OX=10116 GN=Igf2 PE=1 SV=1	P01346	Igf2	20 kDa																4	4		1	1
Insulin-like growth factor-binding protein 2 OS=Rattus norvegicus OX=10116 GN=Igfbp2 PE=1 SV=3	P12843	Igfbp2	33 kDa																7	13			4
Inter-alpha-trypsin inhibitor heavy chain H3 OS=Rattus norvegicus OX=10116 GN=Itih3 PE=2 SV=1	Q63416	Itih3	99 kDa		2				1		2								3				5
Isocitrate dehydrogenase [NAD] subunit alpha, mitochondrial OS=Rattus norvegicus OX=10116 GN=Idh3a PE=1 SV=1	Q99NA5	Idh3a	40 kDa		14			4	16			5
Isocitrate dehydrogenase [NAD] subunit beta, mitochondrial OS=Rattus norvegicus OX=10116 GN=Idh3B PE=2 SV=1	Q68FX0	Idh3B	42 kDa		6				10			1
Junction plakoglobin OS=Rattus norvegicus OX=10116 GN=Jup PE=1 SV=1	Q6P0K8	Jup	82 kDa	TRUE		1	2			2	25			44	22		28	4	1
LIM and SH3 domain protein 1 OS=Rattus norvegicus OX=10116 GN=Lasp1 PE=1 SV=1	Q99MZ8	Lasp1	30 kDa		1							6
Limbic system-associated membrane protein OS=Rattus norvegicus OX=10116 GN=Lsamp PE=1 SV=1	Q62813	Lsamp	37 kDa		8				3
L-lactate dehydrogenase A chain OS=Rattus norvegicus OX=10116 GN=Ldha PE=1 SV=1	P04642	Ldha	36 kDa	TRUE	12	2	3	7	13	11	6	9		4
L-lactate dehydrogenase B chain OS=Rattus norvegicus OX=10116 GN=Ldhb PE=1 SV=2	P42123	Ldhb	37 kDa	TRUE	25	2	6	11	26	8	6	14							3
Low molecular weight phosphotyrosine protein phosphatase OS=Rattus norvegicus OX=10116 GN=Acp1 PE=1 SV=3	P41498	Acp1	18 kDa						3	7													3
Lysozyme C-1 OS=Rattus norvegicus OX=10116 GN=Lyz1 PE=1 SV=2	P00697	Lyz1	17 kDa																1	2			1
Macrophage migration inhibitory factor OS=Rattus norvegicus OX=10116 GN=Mif PE=1 SV=4	P30904	Mif	12 kDa		2		4		1	2	2	2											2
Major prion protein OS=Rattus norvegicus OX=10116 GN=Prnp PE=1 SV=2	P13852	Prnp	28 kDa		4															3
Malate dehydrogenase, cytoplasmic OS=Rattus norvegicus OX=10116 GN=Mdh1 PE=1 SV=3	O88989	Mdh1	36 kDa		26	2	14	17	20	23	16	21	2						3	1
Malate dehydrogenase, mitochondrial OS=Rattus norvegicus OX=10116 GN=Mdh2 PE=1 SV=2	P04636	Mdh2	36 kDa		33	6	18	26	33	28	23	25	2							5
Mammalian ependymin-related protein 1 OS=Rattus norvegicus OX=10116 GN=Epdr1 PE=1 SV=1	Q5XII0	Epdr1	26 kDa					2				1								2
Metallothionein-3 OS=Rattus norvegicus OX=10116 GN=Mt3 PE=2 SV=1	P37361	Mt3	7 kDa						2			3
Methanethiol oxidase OS=Rattus norvegicus OX=10116 GN=Selenbp1 PE=1 SV=1	Q8VIF7	Selenbp1	53 kDa				4	2		6		2
MICOS complex subunit Mic60 (Fragment) OS=Rattus norvegicus OX=10116 GN=Immt PE=1 SV=1	Q3KR86	Immt	67 kDa		12				9
Microtubule-associated protein 1A OS=Rattus norvegicus OX=10116 GN=Map1a PE=1 SV=1	P34926	Map1a	300 kDa	TRUE	6		1	4	5			6
Microtubule-associated protein 1B OS=Rattus norvegicus OX=10116 GN=Map1b PE=1 SV=3	P15205	Map1b	270 kDa	TRUE	7				6			4
Microtubule-associated protein 2 OS=Rattus norvegicus OX=10116 GN=Map2 PE=1 SV=3	P15146	Map2	202 kDa	TRUE	17		2	19	3	2	1	17
Microtubule-associated protein 6 OS=Rattus norvegicus OX=10116 GN=Map6 PE=1 SV=1	Q63560	Map6	100 kDa		3				6			9
Microtubule-associated protein tau OS=Rattus norvegicus OX=10116 GN=Mapt PE=1 SV=3	P19332	Mapt	79 kDa	TRUE	9			6	8		1	11
Mitochondrial glutamate carrier 1 OS=Rattus norvegicus OX=10116 GN=Slc25a22 PE=2 SV=1	A0A0G2K5L2	Slc25a22	35 kDa		1				2
Mitochondrial import receptor subunit TOM70 OS=Rattus norvegicus OX=10116 GN=Tomm70 PE=1 SV=1	Q75Q39	Tomm70	67 kDa		1				1
Mitogen-activated protein kinase 1 OS=Rattus norvegicus OX=10116 GN=Mapk1 PE=1 SV=3	P63086	Mapk1	41 kDa	TRUE	2				3
Murinoglobulin-1 OS=Rattus norvegicus OX=10116 GN=Mug1 PE=2 SV=1	Q03626	Mug1	165 kDa	TRUE	45	16			117	98	62	31			11		11	9	20	23		16	26
Myc box-dependent-interacting protein 1 OS=Rattus norvegicus OX=10116 GN=Bin1 PE=1 SV=1	O08839	Bin1	65 kDa	TRUE	6				2
Myelin basic protein OS=Rattus norvegicus OX=10116 GN=Mbp PE=1 SV=3	P02688	Mbp	22 kDa		21	15	15	17	40	20	16	19	10	9	9	4	8			23		4
Myelin proteolipid protein OS=Rattus norvegicus OX=10116 GN=Plp1 PE=1 SV=2	P60203	Plp1	30 kDa		8	9	9	11	21	11	11	14	10	7	8					12
Myelin-associated glycoprotein OS=Rattus norvegicus OX=10116 GN=Mag PE=1 SV=1	P07722	Mag	69 kDa						6				2
Myelin-oligodendrocyte glycoprotein OS=Rattus norvegicus OX=10116 GN=Mog PE=1 SV=1	Q63345	Mog	28 kDa		4				7			5								3
Myristoylated alanine-rich C-kinase substrate OS=Rattus norvegicus OX=10116 GN=Marcks PE=1 SV=2	P30009	Marcks	30 kDa		2			3	6			3
N(G),N(G)-dimethylarginine dimethylaminohydrolase 1 OS=Rattus norvegicus OX=10116 GN=Ddah1 PE=1 SV=3	O08557	Ddah1	31 kDa	TRUE				2	3	2		6
NAD-dependent protein deacetylase sirtuin-2 OS=Rattus norvegicus OX=10116 GN=Sirt2 PE=1 SV=1	Q5RJQ4	Sirt2	39 kDa		4				11			1	1
NADH dehydrogenase [ubiquinone] 1 alpha subcomplex subunit 10, mitochondrial OS=Rattus norvegicus OX=10116 GN=Ndufa10 PE=1 SV=1	Q561S0	Ndufa10	40 kDa		4				3
NADH dehydrogenase [ubiquinone] flavoprotein 2, mitochondrial OS=Rattus norvegicus OX=10116 GN=Ndufv2 PE=1 SV=2	P19234	Ndufv2	27 kDa		4				3
NADH dehydrogenase [ubiquinone] iron-sulfur protein 2, mitochondrial OS=Rattus norvegicus OX=10116 GN=Ndufs2 PE=1 SV=1	Q641Y2	Ndufs2	53 kDa		1				2
NADH dehydrogenase [ubiquinone] iron-sulfur protein 6, mitochondrial OS=Rattus norvegicus OX=10116 GN=Ndufs6 PE=3 SV=1	P52504	Ndufs6	13 kDa		4							2
NADH-ubiquinone oxidoreductase 75 kDa subunit, mitochondrial OS=Rattus norvegicus OX=10116 GN=Ndufs1 PE=1 SV=1	Q66HF1	Ndufs1	79 kDa		13				11			1
Neural cell adhesion molecule 1 OS=Rattus norvegicus OX=10116 GN=Ncam1 PE=1 SV=1	P13596	Ncam1	95 kDa		33			2	43		4	6							2	4
Neurocan core protein OS=Rattus norvegicus OX=10116 GN=Ncan PE=1 SV=1	P55067	Ncan	136 kDa		1		2	1				4
Neurochondrin OS=Rattus norvegicus OX=10116 GN=Ncdn PE=1 SV=2	O35095	Ncdn	79 kDa		2				14
Neuroendocrine protein 7B2 OS=Rattus norvegicus OX=10116 GN=Scg5 PE=1 SV=1	P27682	Scg5	24 kDa																8	4	2	6	2
Neurofilament heavy polypeptide OS=Rattus norvegicus OX=10116 GN=Nefh PE=1 SV=4	P16884	Nefh	115 kDa	TRUE					9			6								5
Neurofilament light polypeptide OS=Rattus norvegicus OX=10116 GN=Nefl PE=1 SV=3	P19527	Nefl	61 kDa	TRUE	3				23											15
Neurofilament medium polypeptide OS=Rattus norvegicus OX=10116 GN=Nefm PE=1 SV=4	P12839	Nefm	96 kDa	TRUE					10			5			1					8
Neurogranin OS=Rattus norvegicus OX=10116 GN=Nrgn PE=1 SV=1	Q04940	Nrgn	7 kDa		5		2	2
Neuromodulin OS=Rattus norvegicus OX=10116 GN=Gap43 PE=1 SV=1	P07936	Gap43	24 kDa		25		6	13	31	5	15	24			2
Neuronal membrane glycoprotein M6-a OS=Rattus norvegicus OX=10116 GN=Gpm6a PE=1 SV=1	Q812E9	Gpm6a	31 kDa	TRUE	8		2	5	4			3								1
Neuronal pentraxin receptor OS=Rattus norvegicus OX=10116 GN=Nptxr PE=1 SV=1	O35764	Nptxr	52 kDa		1														3	13			5
Neuroplastin OS=Rattus norvegicus OX=10116 GN=Nptn PE=1 SV=2	P97546	Nptn	44 kDa		10				4			3							1
Neurosecretory protein VGF OS=Rattus norvegicus OX=10116 GN=Vgf PE=1 SV=3	P20156	Vgf	68 kDa																19	14	7	16	8
Nucleoside diphosphate kinase A OS=Rattus norvegicus OX=10116 GN=Nme1 PE=1 SV=1	Q05982	Nme1	17 kDa	TRUE					4	4
Nucleoside diphosphate kinase B OS=Rattus norvegicus OX=10116 GN=Nme2 PE=1 SV=1	P19804	Nme2	17 kDa	TRUE	9		4	4	3	3
Paralemmin-1 OS=Rattus norvegicus OX=10116 GN=Palm PE=1 SV=1	Q920Q0	Palm	42 kDa		1							4
Parathymosin OS=Rattus norvegicus OX=10116 GN=Ptms PE=1 SV=2	P04550	Ptms	12 kDa				5	5				4
Parkinson disease protein 7 homolog OS=Rattus norvegicus OX=10116 GN=Park7 PE=1 SV=1	O88767	Park7	20 kDa		7		4	5	9	6	3	4
Peptidyl-prolyl cis-trans isomerase A OS=Rattus norvegicus OX=10116 GN=Ppia PE=1 SV=2	P10111	Ppia	18 kDa		26	2	12	16	19	19	11	12	9	5					1	2			2
Peptidyl-prolyl cis-trans isomerase FKBP1A OS=Rattus norvegicus OX=10116 GN=Fkbp1a PE=1 SV=3	Q62658	Fkbp1a	12 kDa		3			3				2
Peroxiredoxin-1 OS=Rattus norvegicus OX=10116 GN=Prdx1 PE=1 SV=1	Q63716	Prdx1	22 kDa	TRUE	6			1	9					2	1				1				5
Peroxiredoxin-2 OS=Rattus norvegicus OX=10116 GN=Prdx2 PE=1 SV=3	P35704	Prdx2	22 kDa		12	4	5	6	12	10		3	2	2	2				5	5			8
Peroxiredoxin-5, mitochondrial OS=Rattus norvegicus OX=10116 GN=Prdx5 PE=1 SV=1	Q9R063	Prdx5	22 kDa		14			2	8	3	2	4
Peroxiredoxin-6 OS=Rattus norvegicus OX=10116 GN=Prdx6 PE=1 SV=3	O35244	Prdx6	25 kDa		5				6	2		1
Phosphate carrier protein, mitochondrial OS=Rattus norvegicus OX=10116 GN=Slc25a3 PE=1 SV=1	P16036	Slc25a3	39 kDa		4				8											1
Phosphatidylethanolamine-binding protein 1 OS=Rattus norvegicus OX=10116 GN=Pebp1 PE=1 SV=3	P31044	Pebp1	21 kDa		16	4	6	11	14	15	9	8							4	3			2
Phosphoglycerate kinase 1 OS=Rattus norvegicus OX=10116 GN=Pgk1 PE=1 SV=2	P16617	Pgk1	45 kDa		26		2	6	29	18	9	21		3					4
Phosphoglycerate mutase 1 OS=Rattus norvegicus OX=10116 GN=Pgam1 PE=1 SV=4	P25113	Pgam1	29 kDa	TRUE	15			3	15	7	4	3		3					1
Plasma membrane calcium-transporting ATPase 1 OS=Rattus norvegicus OX=10116 GN=Atp2b1 PE=1 SV=3	P11505	Atp2b1	135 kDa	TRUE	21							10
Plasma membrane calcium-transporting ATPase 2 OS=Rattus norvegicus OX=10116 GN=Atp2b2 PE=1 SV=2	P11506	Atp2b2	137 kDa	TRUE	21				7
Plasma membrane calcium-transporting ATPase 3 OS=Rattus norvegicus OX=10116 GN=Atp2b3 PE=1 SV=2	Q64568	Atp2b3	139 kDa	TRUE					8										4
Plasma membrane calcium-transporting ATPase 4 OS=Rattus norvegicus OX=10116 GN=Atp2b4 PE=1 SV=1	Q64542	Atp2b4	133 kDa	TRUE	19			1	11
Plasminogen OS=Rattus norvegicus OX=10116 GN=Plg PE=2 SV=2	Q01177	Plg	91 kDa		1	3			10	5	7	1						2	7	6			4
Polyubiquitin-B OS=Rattus norvegicus OX=10116 GN=Ubb PE=1 SV=1	P0CG51 (+3)	Ubb	34 kDa		6		3	3	6	3	3	5	3	5	4		2		3	2	4	2	4
Prepronociceptin OS=Rattus norvegicus OX=10116 GN=Pnoc PE=1 SV=1	Q62923	Pnoc	20 kDa																			1
Proenkephalin-A OS=Rattus norvegicus OX=10116 GN=Penk PE=1 SV=1	P04094	Penk	31 kDa									3							5	5	6	5	3
Profilin-1 OS=Rattus norvegicus OX=10116 GN=Pfn1 PE=1 SV=2	P62963	Pfn1	15 kDa		3				2
Profilin-2 OS=Rattus norvegicus OX=10116 GN=Pfn2 PE=1 SV=3	Q9EPC6	Pfn2	15 kDa		4				2
Prohibitin 1 OS=Rattus norvegicus OX=10116 GN=Phb1 PE=1 SV=1	P67779	Phb1	30 kDa		13				7
Prohibitin-2 OS=Rattus norvegicus OX=10116 GN=Phb2 PE=1 SV=1	Q5XIH7	Phb2	33 kDa		3				7
ProSAAS OS=Rattus norvegicus OX=10116 GN=Pcsk1n PE=1 SV=1	Q9QXU9	Pcsk1n	27 kDa		7			4	6			3							8	9		3	4
Prosaposin OS=Rattus norvegicus OX=10116 GN=Psap PE=1 SV=1	P10960	Psap	61 kDa		5				6			3							5	7			4
Prostaglandin-H2 D-isomerase OS=Rattus norvegicus OX=10116 GN=Ptgds PE=1 SV=2	P22057	Ptgds	21 kDa								3	2							12	11	2	2	7
Proteasome subunit alpha type-1 OS=Rattus norvegicus OX=10116 GN=Psma1 PE=1 SV=2	P18420	Psma1	30 kDa				2	1	3	1				1
Proteasome subunit alpha type-6 OS=Rattus norvegicus OX=10116 GN=Psma6 PE=1 SV=1	P60901	Psma6	27 kDa				3	5				2
Proteasome subunit alpha type-7 OS=Rattus norvegicus OX=10116 GN=Psma7 PE=1 SV=1	P48004	Psma7	28 kDa				1	2	1			2
Proteasome subunit beta type-1 OS=Rattus norvegicus OX=10116 GN=Psmb1 PE=1 SV=3	P18421	Psmb1	26 kDa				4					2
Proteasome subunit beta type-4 OS=Rattus norvegicus OX=10116 GN=Psmb4 PE=1 SV=2	P34067	Psmb4	29 kDa				1	3		3		3
Proteasome subunit beta type-6 OS=Rattus norvegicus OX=10116 GN=Psmb6 PE=1 SV=3	P28073	Psmb6	25 kDa				4	4				2	2
Proteasome subunit beta type-7 OS=Rattus norvegicus OX=10116 GN=Psmb7 PE=1 SV=1	Q9JHW0	Psmb7	30 kDa				1	2
Protein AMBP OS=Rattus norvegicus OX=10116 GN=Ambp PE=1 SV=1	Q64240	Ambp	39 kDa			2					4	1											1
Protein disulfide-isomerase A3 OS=Rattus norvegicus OX=10116 GN=Pdia3 PE=1 SV=2	P11598	Pdia3	57 kDa		1		7	13	9	1	1	9
Protein kinase C and casein kinase substrate in neurons protein 1 OS=Rattus norvegicus OX=10116 GN=Pacsin1 PE=1 SV=1	Q9Z0W5	Pacsin1	50 kDa	TRUE	18		2	7	14	2		9
Protein NDRG2 OS=Rattus norvegicus OX=10116 GN=Ndrg2 PE=1 SV=1	Q8VBU2	Ndrg2	41 kDa		1			2	3
Protein phosphatase 3 catalytic subunit alpha OS=Rattus norvegicus OX=10116 GN=Ppp3ca PE=1 SV=1	P63329	Ppp3ca	59 kDa	TRUE	12				9			7
Protein S100-B OS=Rattus norvegicus OX=10116 GN=S100b PE=1 SV=2	P04631	S100b	11 kDa		5				6	1
Prothrombin OS=Rattus norvegicus OX=10116 GN=F2 PE=1 SV=1	P18292	F2	70 kDa								1									2
Prothymosin alpha OS=Rattus norvegicus OX=10116 GN=Ptma PE=1 SV=2	P06302	Ptma	12 kDa				5	5			4
Purine nucleoside phosphorylase OS=Rattus norvegicus OX=10116 GN=Pnp PE=1 SV=1	P85973	Pnp	32 kDa							1		3
Pyridoxal kinase OS=Rattus norvegicus OX=10116 GN=Pdxk PE=1 SV=1	O35331	Pdxk	35 kDa				2	3				2
Pyruvate dehydrogenase E1 component subunit alpha, somatic form, mitochondrial OS=Rattus norvegicus OX=10116 GN=Pdha1 PE=1 SV=2	P26284	Pdha1	43 kDa		8	1	1	9	8		3	6
Pyruvate dehydrogenase E1 component subunit beta, mitochondrial OS=Rattus norvegicus OX=10116 GN=Pdhb PE=1 SV=2	P49432	Pdhb	39 kDa		16		1	11	13		3	7
Pyruvate kinase PKM OS=Rattus norvegicus OX=10116 GN=Pkm PE=1 SV=3	P11980	Pkm	58 kDa	TRUE	61	7	28	31	57	61	25	46	5	3			4			8
Rab GDP dissociation inhibitor alpha OS=Rattus norvegicus OX=10116 GN=Gdi1 PE=1 SV=1	P50398	Gdi1	51 kDa	TRUE	19	1	7	9	29	16	7	10
Rab GDP dissociation inhibitor beta OS=Rattus norvegicus OX=10116 GN=Gdi2 PE=1 SV=2	P50399	Gdi2	51 kDa	TRUE	11				14	7		2
Ras-related C3 botulinum toxin substrate 1 OS=Rattus norvegicus OX=10116 GN=Rac1 PE=1 SV=1	Q6RUV5	Rac1	21 kDa	TRUE	4			1	7			1
Ras-related protein Rab-11B OS=Rattus norvegicus OX=10116 GN=Rab11b PE=1 SV=4	O35509	Rab11b	24 kDa		2				1
Ras-related protein Rab-14 OS=Rattus norvegicus OX=10116 GN=Rab14 PE=1 SV=3	P61107	Rab14	24 kDa	TRUE	4				3
Ras-related protein Rab-1A OS=Rattus norvegicus OX=10116 GN=Rab1A PE=1 SV=3	Q6NYB7	Rab1A	23 kDa	TRUE	4				9	1	3	6
Ras-related protein Rab-1B OS=Rattus norvegicus OX=10116 GN=Rab1b PE=1 SV=1	P10536	Rab1b	22 kDa	TRUE	4				7
Ras-related protein Rab-2A OS=Rattus norvegicus OX=10116 GN=Rab2a PE=2 SV=1	P05712	Rab2a	24 kDa		6				2
Ras-related protein Rab-3A OS=Rattus norvegicus OX=10116 GN=Rab3a PE=1 SV=1	P63012	Rab3a	25 kDa	TRUE	12			3	10	3	5	12
Ras-related protein Rab-7a OS=Rattus norvegicus OX=10116 GN=Rab7a PE=1 SV=2	P09527	Rab7a	24 kDa	TRUE	2				5
Receptor-type tyrosine-protein phosphatase zeta OS=Rattus norvegicus OX=10116 GN=Ptprz1 PE=1 SV=1	Q62656	Ptprz1	255 kDa		2		1	2					3
Retinol-binding protein 4 OS=Rattus norvegicus OX=10116 GN=Rbp4 PE=1 SV=1	P04916	Rbp4	23 kDa																8	9			2
Rho GDP-dissociation inhibitor 1 OS=Rattus norvegicus OX=10116 GN=Arhgdia PE=1 SV=1	Q5XI73	Arhgdia	23 kDa		4				4			5											1
S-adenosylhomocysteine hydrolase-like protein 1 OS=Rattus norvegicus OX=10116 GN=Ahcyl1 PE=1 SV=2	B5DFN2	Ahcyl1	54 kDa		2				11
Sarcoplasmic/endoplasmic reticulum calcium ATPase 2 OS=Rattus norvegicus OX=10116 GN=Atp2a2 PE=1 SV=1	P11507	Atp2a2	115 kDa		1				5			4
Secernin-1 OS=Rattus norvegicus OX=10116 GN=Scrn1 PE=1 SV=1	Q6AY84	Scrn1	46 kDa					4	4	1		3
Secretogranin-1 OS=Rattus norvegicus OX=10116 GN=Chgb PE=1 SV=2	O35314	Chgb	78 kDa					2											28	24	18	24	17
Secretogranin-2 OS=Rattus norvegicus OX=10116 GN=Scg2 PE=1 SV=1	P10362	Scg2	71 kDa		2			5	3										10	9	4	8
Secretogranin-3 OS=Rattus norvegicus OX=10116 GN=Scg3 PE=1 SV=1	P47868	Scg3	53 kDa																3	4		4
Septin-11 OS=Rattus norvegicus OX=10116 GN=Septin11 PE=1 SV=1	B3GNI6	Septin11	50 kDa	TRUE					5			1
Septin-5 OS=Rattus norvegicus OX=10116 GN=Septin5 PE=1 SV=2	Q9JJM9	Septin5	43 kDa	TRUE	6				5
Septin-7 OS=Rattus norvegicus OX=10116 GN=Septin7 PE=1 SV=1	Q9WVC0	Septin7	51 kDa	TRUE	10				6			2
Septin-8 OS=Rattus norvegicus OX=10116 GN=Septin8 PE=1 SV=1	B0BNF1	Septin8	51 kDa	TRUE	6				4
Serine protease 1 OS=Rattus norvegicus OX=10116 GN=Prss1 PE=1 SV=1	P00762	Prss1	26 kDa			8										9						7	8
Serine protease inhibitor A3K OS=Rattus norvegicus OX=10116 GN=Serpina3k PE=1 SV=3	P05545	Serpina3k	47 kDa	TRUE	18	8	1		25	12	17	13						7	30	16		7	20
Serine protease inhibitor A3L OS=Rattus norvegicus OX=10116 GN=Serpina3l PE=1 SV=3	P05544	Serpina3l	46 kDa	TRUE	6	9			24	16	26	5						2	27	18		7	18
Serine protease inhibitor A3N OS=Rattus norvegicus OX=10116 GN=Serpina3n PE=1 SV=3	P09006	Serpina3n	47 kDa	TRUE					12		7	4							3	2		2
Serine/threonine-protein phosphatase 2A catalytic subunit alpha isoform OS=Rattus norvegicus OX=10116 GN=Ppp2ca PE=1 SV=1	P63331	Ppp2ca	36 kDa		2				5			6
Serine/threonine-protein phosphatase 2A catalytic subunit beta isoform OS=Rattus norvegicus OX=10116 GN=Ppp2cb PE=2 SV=1	P62716 (+1)	Ppp2cb	36 kDa					2		2
Serotransferrin OS=Rattus norvegicus OX=10116 GN=Tf PE=1 SV=3	P12346	Tf	76 kDa		78	43	47	58	87	114	118	68	8	41	43	45	68	28	96	96	74	58	80
Sideroflexin-1 OS=Rattus norvegicus OX=10116 GN=Sfxn1 PE=2 SV=4	Q63965	Sfxn1	36 kDa	TRUE	2				3
Sodium- and chloride-dependent GABA transporter 3 OS=Rattus norvegicus OX=10116 GN=Slc6a11 PE=1 SV=1	P31647	Slc6a11	70 kDa		2				12
Sodium/potassium-transporting ATPase subunit alpha-1 OS=Rattus norvegicus OX=10116 GN=Atp1a1 PE=1 SV=1	P06685	Atp1a1	113 kDa	TRUE	81	15		40	71		24	51							63	21			5
Sodium/potassium-transporting ATPase subunit alpha-2 OS=Rattus norvegicus OX=10116 GN=Atp1a2 PE=1 SV=1	P06686	Atp1a2	112 kDa	TRUE	74	12	13	41	94		21	46							27	15
Sodium/potassium-transporting ATPase subunit alpha-3 OS=Rattus norvegicus OX=10116 GN=Atp1a3 PE=1 SV=2	P06687	Atp1a3	112 kDa	TRUE	116	21	19	53	124	13	29	61	16						27	23
Sodium/potassium-transporting ATPase subunit beta-1 OS=Rattus norvegicus OX=10116 GN=Atp1b1 PE=1 SV=1	P07340	Atp1b1	35 kDa		22	2	2	11	23	2	6	12	2						12	8			2
Sodium/potassium-transporting ATPase subunit beta-2 OS=Rattus norvegicus OX=10116 GN=Atp1b2 PE=1 SV=1	P13638	Atp1b2	33 kDa		8				9
Solute carrier family 12 member 5 OS=Rattus norvegicus OX=10116 GN=Slc12a5 PE=1 SV=2	Q63633	Slc12a5	126 kDa	TRUE	2				1
Somatostatin OS=Rattus norvegicus OX=10116 GN=Sst PE=1 SV=1	P60042	Sst	13 kDa																			1	2
SPARC OS=Rattus norvegicus OX=10116 GN=Sparc PE=1 SV=4	P16975	Sparc	34 kDa																3	6
SPARC-like protein 1 OS=Rattus norvegicus OX=10116 GN=Sparcl1 PE=1 SV=1	P24054	Sparcl1	71 kDa																2	3
Spectrin alpha chain, non-erythrocytic 1 OS=Rattus norvegicus OX=10116 GN=Sptan1 PE=1 SV=2	P16086	Sptan1	285 kDa	TRUE	50		4	11	30		1	20	8							1
Stathmin OS=Rattus norvegicus OX=10116 GN=Stmn1 PE=1 SV=2	P13668	Stmn1	17 kDa	TRUE	10		3	5	4	2	8	11
Stress-70 protein, mitochondrial OS=Rattus norvegicus OX=10116 GN=Hspa9 PE=1 SV=3	P48721	Hspa9	74 kDa	TRUE	8		1	3	12			5
Stress-induced-phosphoprotein 1 OS=Rattus norvegicus OX=10116 GN=Stip1 PE=1 SV=1	O35814	Stip1	63 kDa		2				1
Succinate dehydrogenase [ubiquinone] flavoprotein subunit, mitochondrial OS=Rattus norvegicus OX=10116 GN=Sdha PE=1 SV=1	Q920L2	Sdha	72 kDa		2			1	2
Succinate dehydrogenase [ubiquinone] iron-sulfur subunit, mitochondrial OS=Rattus norvegicus OX=10116 GN=Sdhb PE=2 SV=2	P21913	Sdhb	32 kDa		3			1	3
Succinate--CoA ligase [ADP/GDP-forming] subunit alpha, mitochondrial OS=Rattus norvegicus OX=10116 GN=Suclg1 PE=2 SV=2	P13086	Suclg1	36 kDa						3			1
Succinate-semialdehyde dehydrogenase, mitochondrial OS=Rattus norvegicus OX=10116 GN=Aldh5a1 PE=1 SV=2	P51650	Aldh5a1	56 kDa		2			1	14			4
Succinyl-CoA:3-ketoacid coenzyme A transferase 1, mitochondrial OS=Rattus norvegicus OX=10116 GN=Oxct1 PE=1 SV=1	B2GV06	Oxct1	56 kDa		2							2
Superoxide dismutase [Cu-Zn] OS=Rattus norvegicus OX=10116 GN=Sod1 PE=1 SV=2	P07632	Sod1	16 kDa		18	2	15	18	12	17	12	16	8	3	4		5		10	7	9	2	12
Superoxide dismutase [Mn], mitochondrial OS=Rattus norvegicus OX=10116 GN=Sod2 PE=1 SV=2	P07895	Sod2	25 kDa		3		1	2	6	4		2	1
Synapsin-1 OS=Rattus norvegicus OX=10116 GN=Syn1 PE=1 SV=3	P09951	Syn1	74 kDa	TRUE	40	2	3	4	18	4	13	19			4					4		2
Synapsin-2 OS=Rattus norvegicus OX=10116 GN=Syn2 PE=1 SV=1	Q63537	Syn2	63 kDa	TRUE	17				8	1	4	6
Synaptic vesicle glycoprotein 2A OS=Rattus norvegicus OX=10116 GN=Sv2a PE=1 SV=2	Q02563	Sv2a	83 kDa	TRUE	5				3
Synaptic vesicle membrane protein VAT-1 homolog OS=Rattus norvegicus OX=10116 GN=Vat1 PE=1 SV=1	Q3MIE4	Vat1	43 kDa		1				9
Synaptogyrin-1 OS=Rattus norvegicus OX=10116 GN=Syngr1 PE=1 SV=1	Q62876	Syngr1	26 kDa					2	3
Synaptojanin-1 OS=Rattus norvegicus OX=10116 GN=Synj1 PE=1 SV=3	Q62910	Synj1	173 kDa		4				2
Synaptophysin OS=Rattus norvegicus OX=10116 GN=Syp PE=1 SV=1	P07825	Syp	33 kDa		7	1	1	3	6	2	2	4								2
Synaptosomal-associated protein 25 OS=Rattus norvegicus OX=10116 GN=Snap25 PE=1 SV=1	P60881	Snap25	23 kDa		19			3	10	1	3	10
Synaptotagmin-1 OS=Rattus norvegicus OX=10116 GN=Syt1 PE=1 SV=3	P21707	Syt1	47 kDa	TRUE	19			4	15	4	3	5
Syntaxin-1A OS=Rattus norvegicus OX=10116 GN=Stx1a PE=1 SV=1	P32851	Stx1a	33 kDa	TRUE	10							2								1
Syntaxin-1B OS=Rattus norvegicus OX=10116 GN=Stx1b PE=1 SV=1	P61265	Stx1b	33 kDa	TRUE	21			5	21	5	6	12								2
Syntaxin-binding protein 1 OS=Rattus norvegicus OX=10116 GN=Stxbp1 PE=1 SV=1	P61765	Stxbp1	68 kDa	TRUE	41	2	3	7	37	12	6	15								3
Tenascin-R OS=Rattus norvegicus OX=10116 GN=Tnr PE=1 SV=1	Q05546	Tnr	149 kDa		10			1	2			3
Thioredoxin OS=Rattus norvegicus OX=10116 GN=Txn PE=1 SV=2	P11232	Txn	12 kDa						1	2
Thiosulfate sulfurtransferase OS=Rattus norvegicus OX=10116 GN=Tst PE=1 SV=3	P24329	Tst	33 kDa					1		1
Thy-1 membrane glycoprotein OS=Rattus norvegicus OX=10116 GN=Thy1 PE=1 SV=1	P01830	Thy1	18 kDa		8			5	7				1							2	1
Thymosin beta-10 OS=Rattus norvegicus OX=10116 GN=Tmsb10 PE=1 SV=2	P63312	Tmsb10	5 kDa	TRUE	2							2
Thymosin beta-4 OS=Rattus norvegicus OX=10116 GN=Tmsb4x PE=1 SV=2	P62329	Tmsb4x	5 kDa	TRUE	8		8	10	9	8	8	12	2		1
T-kininogen 1 OS=Rattus norvegicus OX=10116 GN=Map1 PE=1 SV=2	P01048	Map1	48 kDa	TRUE	5	4			10	5	12	5						1	11	8			12
T-kininogen 2 OS=Rattus norvegicus OX=10116 PE=1 SV=2	P08932		48 kDa	TRUE	4					3	11								8	8			12
Transaldolase OS=Rattus norvegicus OX=10116 GN=Taldo1 PE=1 SV=2	Q9EQS0	Taldo1	37 kDa				1			2
Transgelin-3 OS=Rattus norvegicus OX=10116 GN=Tagln3 PE=1 SV=2	P37805	Tagln3	23 kDa	TRUE	2				5			2
Transitional endoplasmic reticulum ATPase OS=Rattus norvegicus OX=10116 GN=Vcp PE=1 SV=3	P46462	Vcp	89 kDa		12		3	7	11	3		3											5
Transketolase OS=Rattus norvegicus OX=10116 GN=Tkt PE=1 SV=1	P50137	Tkt	68 kDa		4				3
Transthyretin OS=Rattus norvegicus OX=10116 GN=Ttr PE=1 SV=1	P02767	Ttr	16 kDa					3	4		7	4				2		5	15	32	19	10	11
Triosephosphate isomerase OS=Rattus norvegicus OX=10116 GN=Tpi1 PE=1 SV=2	P48500	Tpi1	27 kDa		41	1	11	16	35	36	13	20	2	1					1
Tropomyosin alpha-1 chain OS=Rattus norvegicus OX=10116 GN=Tpm1 PE=1 SV=3	P04692	Tpm1	33 kDa	TRUE			2	6
Tropomyosin alpha-3 chain OS=Rattus norvegicus OX=10116 GN=Tpm3 PE=1 SV=2	Q63610	Tpm3	29 kDa	TRUE	6		4	7	3	4		6	2	6
Tubulin alpha-1A chain OS=Rattus norvegicus OX=10116 GN=Tuba1a PE=1 SV=1	P68370	Tuba1a	50 kDa	TRUE	69	12	11	31	67	21	27	27	5	11					2	19		1	3
Tubulin alpha-4A chain OS=Rattus norvegicus OX=10116 GN=Tuba4a PE=1 SV=1	Q5XIF6	Tuba4a	50 kDa	TRUE	65	8	6	31	65	15	21	22	2	13						19			1
Tubulin beta-2A chain OS=Rattus norvegicus OX=10116 GN=Tubb2a PE=1 SV=1	P85108	Tubb2a	50 kDa	TRUE	106		10	31	79	19	20	23	1
Tubulin beta-3 chain OS=Rattus norvegicus OX=10116 GN=Tubb3 PE=1 SV=1	Q4QRB4	Tubb3	50 kDa	TRUE	77	6	9	30	62		18	19								14
Tubulin beta-4B chain OS=Rattus norvegicus OX=10116 GN=Tubb4b PE=1 SV=1	Q6P9T8	Tubb4b	50 kDa	TRUE	101	108	11	31	69	17	19	23		12						20		4	6
Tubulin beta-5 chain OS=Rattus norvegicus OX=10116 GN=Tubb5 PE=1 SV=1	P69897	Tubb5	50 kDa	TRUE	90	9	14	33	73		19	21		11
Tubulin polymerization-promoting protein OS=Rattus norvegicus OX=10116 GN=Tppp PE=1 SV=1	D3ZQL7	Tppp	24 kDa		4			4	8		2	5
Ubiquitin carboxyl-terminal hydrolase isozyme L1 OS=Rattus norvegicus OX=10116 GN=Uchl1 PE=1 SV=2	Q00981	Uchl1	25 kDa		23	1	7	14	21	17	5	8											1
Ubiquitin-conjugating enzyme E2 N OS=Rattus norvegicus OX=10116 GN=Ube2n PE=1 SV=1	Q9EQX9	Ube2n	17 kDa		4				3
Ubiquitin-like modifier-activating enzyme 1 OS=Rattus norvegicus OX=10116 GN=Uba1 PE=1 SV=1	Q5U300	Uba1	118 kDa		6			2	7
Vesicle-associated membrane protein 2 OS=Rattus norvegicus OX=10116 GN=Vamp2 PE=1 SV=2	P63045	Vamp2	13 kDa	TRUE	15	1	1	4	7	2	4	4								1		1
Vesicle-fusing ATPase OS=Rattus norvegicus OX=10116 GN=Nsf PE=1 SV=1	Q9QUL6	Nsf	83 kDa		25	1	1	6	17	1		4
Vimentin OS=Rattus norvegicus OX=10116 GN=Vim PE=1 SV=2	P31000	Vim	54 kDa	TRUE							4												12
Visinin-like protein 1 OS=Rattus norvegicus OX=10116 GN=Vsnl1 PE=1 SV=2	P62762	Vsnl1	22 kDa		4				8			2
Vitamin D-binding protein OS=Rattus norvegicus OX=10116 GN=Gc PE=1 SV=3	P04276	Gc	54 kDa		5	5		1	17	16	28	10					3		20	17	1		11
Voltage-dependent anion-selective channel protein 1 OS=Rattus norvegicus OX=10116 GN=Vdac1 PE=1 SV=4	Q9Z2L0	Vdac1	31 kDa		19	1		3	15			4
Voltage-dependent anion-selective channel protein 2 OS=Rattus norvegicus OX=10116 GN=Vdac2 PE=1 SV=2	P81155	Vdac2	32 kDa	TRUE	7			1	16					4
Voltage-dependent anion-selective channel protein 3 OS=Rattus norvegicus OX=10116 GN=Vdac3 PE=1 SV=2	Q9R1Z0	Vdac3	31 kDa	TRUE	6				8
V-type proton ATPase 116 kDa subunit a 1 OS=Rattus norvegicus OX=10116 GN=Atp6v0a1 PE=1 SV=1	P25286	Atp6v0a1	96 kDa		19			1	13			4
V-type proton ATPase subunit B, brain isoform OS=Rattus norvegicus OX=10116 GN=Atp6v1b2 PE=1 SV=1	P62815	Atp6v1b2	57 kDa		25		3	4	20		3	5		1
V-type proton ATPase subunit C 1 OS=Rattus norvegicus OX=10116 GN=Atp6v1c1 PE=1 SV=1	Q5FVI6	Atp6v1c1	44 kDa		3				1
V-type proton ATPase subunit E 1 OS=Rattus norvegicus OX=10116 GN=Atp6v1e1 PE=1 SV=1	Q6PCU2	Atp6v1e1	26 kDa		12		1	2	7
WD repeat-containing protein 1 OS=Rattus norvegicus OX=10116 GN=Wdr1 PE=1 SV=3	Q5RKI0	Wdr1	66 kDa		1			5	6
